|                                                                                                       |
|-------------------------------------------------------------------------------------------------------|
| <b>Table S1: Fly strains</b>                                                                          |
| <b>Wild type and mutant stocks</b>                                                                    |
| w <sup>1118</sup>                                                                                     |
| Canton S                                                                                              |
| <i>Apterous-lacZ</i>                                                                                  |
| <i>numb</i> <sup>15</sup> , <i>P{neoFRT}40A/CyO</i>                                                   |
| <i>P{ry[+t7.2]=neoFRT}82B e<sup>s</sup>, spdo<sup>G104</sup>/TM3 Sb</i>                               |
| <i>nkx6</i> <sup>D25</sup> , <i>P{FRT(w[hs])}2A/TM6b Tb</i>                                           |
| <i>hb9</i> <sup>ij154</sup> , <i>P{FRT(w[hs])}2A/TM6b Tb</i>                                          |
| <i>tup</i> <sup>isl-1</sup> , <i>P{ry[+t7.2]=neoFRT}40A/CyO</i>                                       |
| <i>dac</i> <sup>E462</sup> <i>P{neoFRT}40A/CyO</i>                                                    |
| <b>Fly lines used for the Gal4/UAS experiments</b>                                                    |
| <i>UAS-hb9</i>                                                                                        |
| <i>UAS-nkx6</i>                                                                                       |
| <i>UAS-unc4</i>                                                                                       |
| <i>Gene Switch-Elav-Gal4</i>                                                                          |
| <b>Fly lines used for MARCM analysis</b>                                                              |
| <i>P{GawB}elav[C155] ; P{FRT(w[hs])}G13, P{tubP-GAL80}LL2</i>                                         |
| <i>P{GawB}elav[C155], P{FRT(w[hs])}G13 P{UAS-mCD8::GFP.L}LL5</i>                                      |
| <i>P{hsFLP}1 ; P{FRT(w[hs])}G13 P{tubP-GAL80}LL2/CyO,</i><br><i>P{FRT(w[hs])}G13 P{tubP-GAL80}LL2</i> |
| <i>P{tubP-GAL80}LL10 P{neoFRT}40A/CyO</i>                                                             |
| <i>y[1] w<sup>1118</sup> ; P{tubP-GAL80}LL9 P{FRT(w[hs])}2A/TM3, Sb</i>                               |

| <b>Table S2: Antibodies used in gene expression studies</b> |                    |                           |
|-------------------------------------------------------------|--------------------|---------------------------|
| Antibody Specificity                                        | Species            | Reference                 |
| Hb9                                                         | Rabbit, guinea pig | Broihier and Skeath, 2002 |
| Lim3                                                        | Guinea pig         | Broihier et al., 2004     |
| Islet                                                       | Rat                | Broihier et al., 2004     |
| Nkx6                                                        | Rat                | Broihier et al., 2004     |
| Dbx                                                         | Guinea pig         | Lacin et al., 2009        |
| Nmr1                                                        | Rabbit             | Leal et al., 2009         |
| Msh                                                         | Rabbit             | McDonald et al., 1998     |
| Bar-H1/2                                                    | Rabbit             | Higashijima et al., 1992  |
| Unc4                                                        | Rabbit             | this paper                |
| Dichaete                                                    | Rabbit             | Nambu and Nambu, 1996     |
| Vestigial                                                   | Rabbit             | Guss et al., 2008         |
| NOS                                                         | Guinea pig         | Lacin et al., submitted   |
| GFP                                                         | Rabbit             | Torrey Pines and Roche    |
| β-galactosidase                                             | Mouse and Rabbit   | Invitrogen                |
| Invected/engrailed 4D9                                      | Mouse              | Patel et al., 1989        |
| Cut 2B10                                                    | Mouse              | Blochinger et al., 1993   |
| FasII 1D4                                                   | Mouse              | van Vactor et al., 1993   |
| Chinmo                                                      | Rabbit             | Zhu et al., 2006          |
| Broad-Complex                                               | Mouse              | Emery, 1994               |

| <b>Table S3: Genes assayed for expression in post-embryonic neurons</b>                             |                                  |             |           |
|-----------------------------------------------------------------------------------------------------|----------------------------------|-------------|-----------|
| <b>Transcription factors expressed in discrete clusters of neurons in post-embryonic lineages</b>   |                                  |             |           |
| Vestigial                                                                                           | Msh                              | Cut         | Dichaete  |
| Unc4                                                                                                | Dbx                              | Nmr1        | BarH1/2   |
| Engrailed                                                                                           | Apterous                         | Hb9         | Lim3      |
| Islet                                                                                               | Nkx6                             | Dachshund   |           |
|                                                                                                     |                                  |             |           |
| <b>Transcription factors expressed in subsets of neurons in most or all post-embryonic lineages</b> |                                  |             |           |
| Zfh-1                                                                                               | Lim1                             | Castor      | Hunchback |
| Kruppel                                                                                             | Pdm2                             |             |           |
|                                                                                                     |                                  |             |           |
| <b>Transcription factors not expressed in clusters of neurons in post-embryonic lineages</b>        |                                  |             |           |
| Pdm3                                                                                                | Dimmed                           | FoxD        | Pointed   |
| Eve (may label one lineage)                                                                         | Eagle (expressed in progenitors) | Eyes Absent |           |

| <b>Table S4: Transcription factor expression in post-embryonic lineages</b> |                            |                                            |
|-----------------------------------------------------------------------------|----------------------------|--------------------------------------------|
| <b>Lineage</b>                                                              | <b>A hemi-lineage</b>      | <b>B hemi-lineage</b>                      |
| <b>Lineage 0</b>                                                            | En (n>10*)                 | PCD*                                       |
| <b>Lineage 1</b>                                                            | Msh (n>10)                 | Nmr1 (n=4)                                 |
| <b>Lineage 2</b>                                                            | ?                          | PCD                                        |
| <b>Lineage 3</b>                                                            | Nkx6 (n>10);<br>Nmr1 (n=3) | Dbx (n>10); Dacs (n=4)                     |
| <b>Lineage 4</b>                                                            | PCD                        | Hb9 (n>10); Nkx6 (n=4);<br>Ap-lacZ (n=0)** |
| <b>Lineage 5</b>                                                            | PCD                        | Vg (n=2); Cut (n=7)                        |
| <b>Lineage 6</b>                                                            | ?                          | En (n=5); Vg (n=3); Cut (n=4)              |
| <b>Lineage 7</b>                                                            | PCD                        | Unc4 (n>10)                                |
| <b>Lineage 8</b>                                                            | ?                          | Lim3 (n=5)                                 |
| <b>Lineage 9</b>                                                            | Msh                        | Lim3 (n=7); Islet (n=0)**                  |
| <b>Lineage 10</b>                                                           | PCD                        | Hb9 (n>10); Nkx6 (n=3);<br>Lim3 (n=5)      |
| <b>Lineage 11</b>                                                           | Nkx6 (n=4);<br>Unc4 (n=6)  | ?                                          |
| <b>Lineage 12</b>                                                           | Unc4 (n>10)                | Nkx6 (n>10); Nmr1 (n=4)                    |
| <b>Lineage 13</b>                                                           | Dbx (n>10)                 | Dichaete (n=7); Vg (n=1)                   |
| <b>Lineage 14</b>                                                           | Msh (n>10)                 | PCD; Lim3 (n=4); Islet (n=0)**             |
| <b>Lineage 15</b>                                                           | PCD                        | Lim3 (n>10); Nkx6 (n>10);<br>Islet (n=0)** |
| <b>Lineage 16</b>                                                           | PCD                        | Hb9 (n=>10); Lim3 (n=7))                   |
| <b>Lineage 17</b>                                                           | Unc4 (n=4);<br>Islet (n=2) | PCD                                        |
| <b>Lineage18</b>                                                            | PCD                        | Unc4 (n=6)                                 |
| <b>Lineage 19</b>                                                           | Dbx (n=6)                  | Unc4 (n=8)                                 |
| <b>Lineage 20</b>                                                           | BarH (n=7) <sup>#</sup>    | PCD*/BarH                                  |
| <b>Lineage 21</b>                                                           | Msh (n>10)                 | PCD*                                       |
| <b>Lineage 22</b>                                                           | BarH(n=7) <sup>#</sup>     | PCD*/BarH                                  |
| <b>Lineage 23</b>                                                           | PCD                        | Unc4 (n=5)                                 |
| <b>Lineage 24</b>                                                           | PCD                        | Nkx6/? (n=2 of 4)                          |

PCD: Indicates that most cells in hemilineage die

\*: denotes number of wild-type clones assayed for this lineage and transcription factor.

\*\*: Islet expression in lineages 9, 14, and 15 based on co-expression with Lim3; Ap-lacZ expression in lineage 4 based on co-expression with Hb9

<sup>#</sup>: 7 BarH<sup>+</sup> clones were generated for lineages 20 and 22.

**Figure S1**

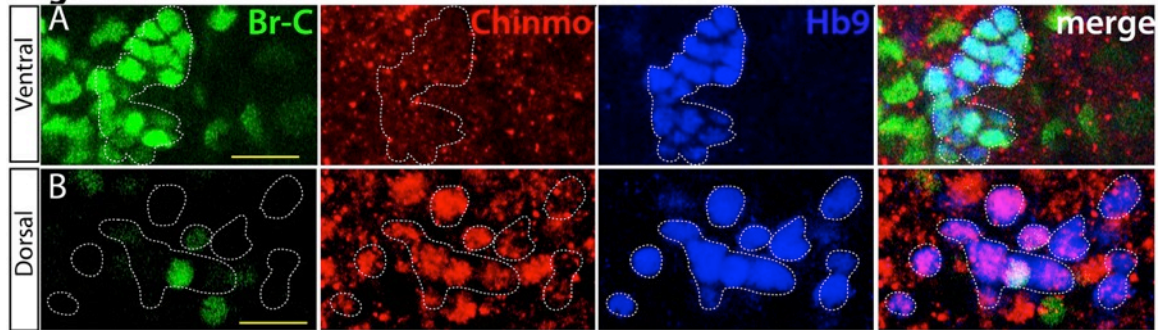

Figure S1) Hb9, Chinmo, and Broad expression in a thoracic neuromere of a late third instar larva.

(A, B) Ventral (A) and dorsal (B) views of a portion of a thoracic hemineuromere labeled for Broad (green), Chinmo (red), and Hb9 (blue). (A) Most small, ventral Hb9<sup>+</sup> neurons express Broad. (B) Most large, dorsal Hb9<sup>+</sup> neurons express Chinmo; a few express Broad. Anterior - up; scale bar: 10um.

**Figure S2**

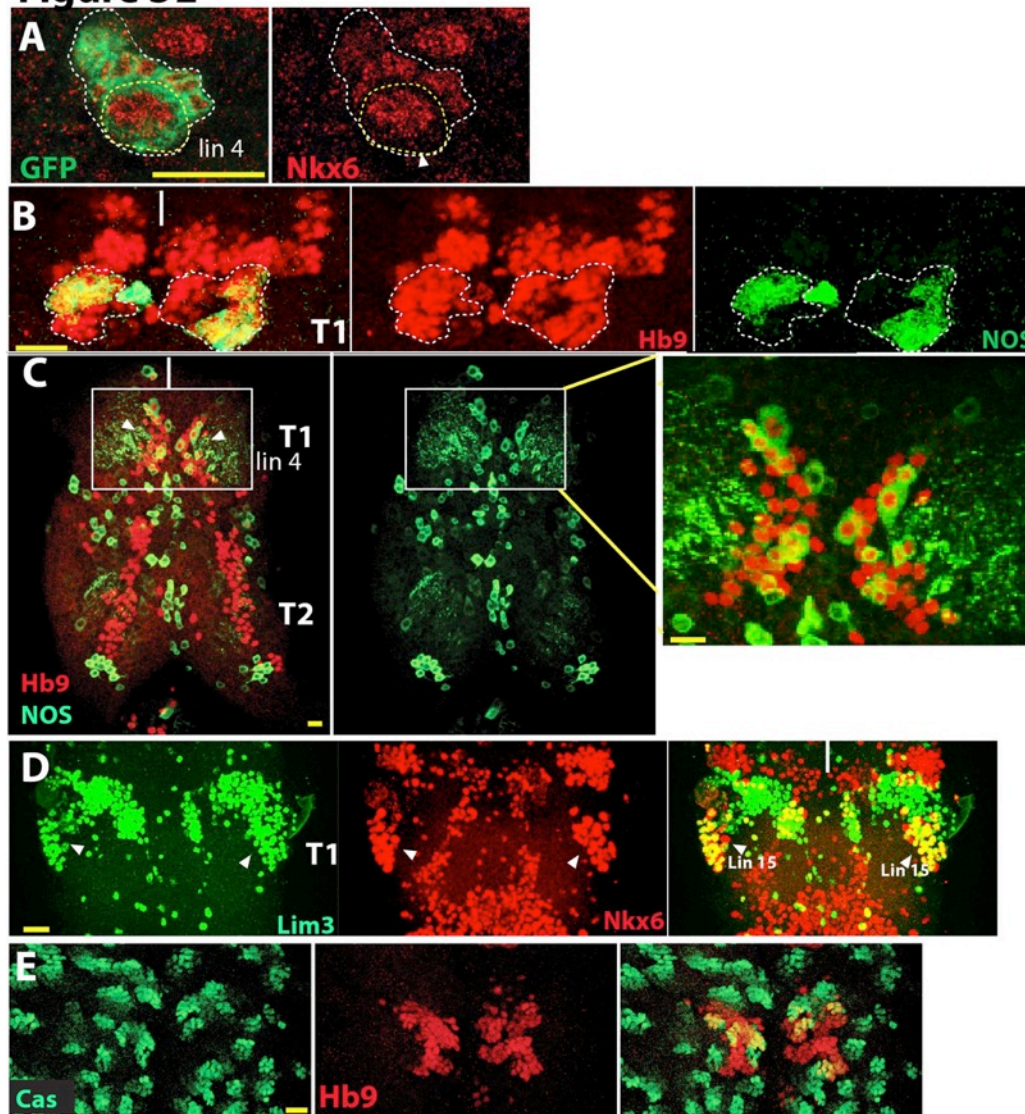

Figure S2) Hb9, Nkx6, Lim3, and Cas expression in thoracic post-embryonic lineages. (A) Wild-type lineage 4 MARCM clone in late-third instar larval CNS labeled for Nkx6 expression (red); arrowhead points to the NB, identified based on its large size and ventral position within clone. (B) Hb9 (red) and NOS (green) co-expression in lineage 4 neurons (dashed lines) of a late-third instar larva. (C) NOS expression (green) is maintained in Hb9<sup>+</sup> neurons (red; arrowheads) in the first thoracic segment of the adult nerve cord. (D) In the adult CNS, Lim3 and Nkx6 co-expression in lineage 15 neurons (arrowheads), all of which are motor neurons. For simplicity, only the first thoracic segment is shown. (E) In late-third instar larvae, Cas (green) and Hb9 (red) expression in post-embryonic neuronal lineages. In B-D T1, T2, and T3 refer to identity of thoracic segment. Anterior is up; white line marks ventral midline. Scale bar – 10μm.

**Figure S3**

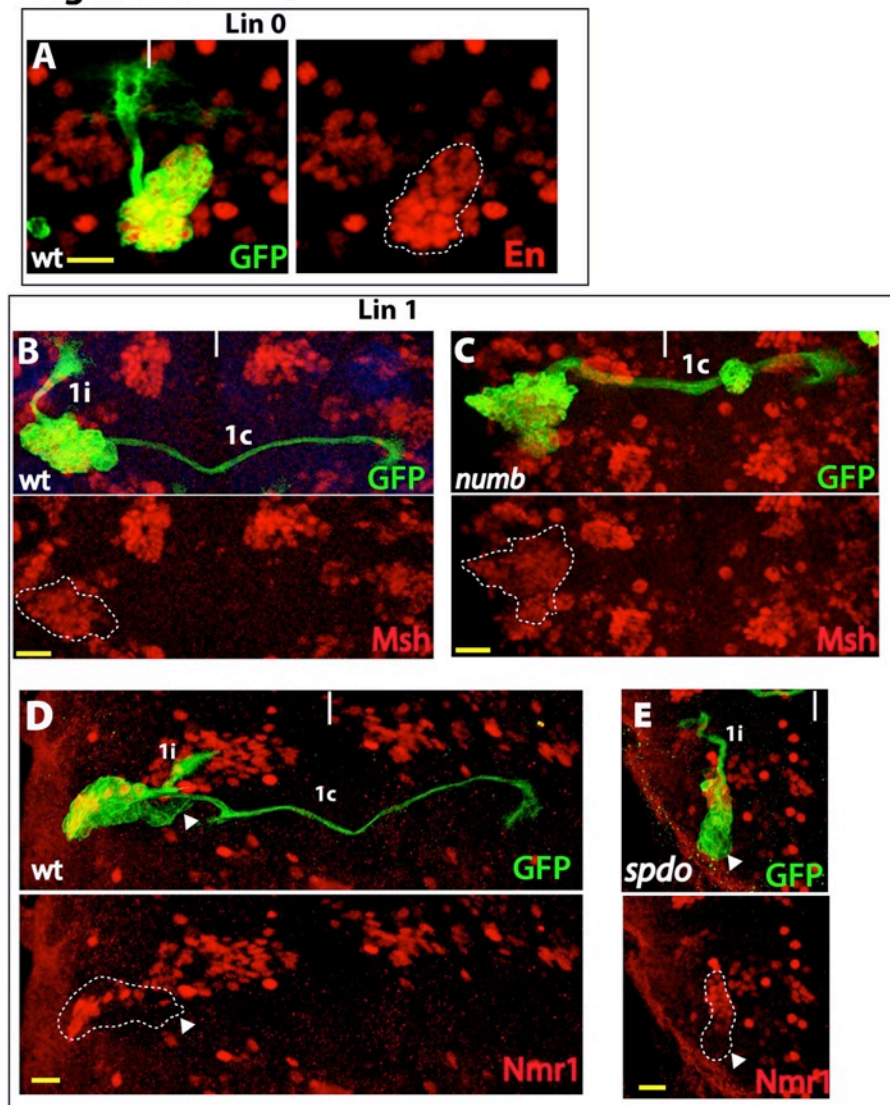

Figure S3) MARCM analysis of lineages 0 and 1 in late-third instar larvae.

(A) Wild-type lineage 0 clone labeled for Engrailed. (B, D) Wild type lineage 1 MARCM clones labeled for Msh (B) and Nmr1 (D) extend neurite bundles contralaterally (1c) and ipsilaterally (1i). (C) *numb* mutant lineage 1 MARCM clone labeled for Msh contains mostly Msh<sup>+</sup> neurons and extends a neurite bundle contralaterally (1c). (E) *spdo* mutant lineage 1 MARCM clone labeled for Nmr1 contains mostly Nmr1<sup>+</sup> neurons and extends a neurite bundle ipsilaterally (1i). Arrowheads in D, E point to the NB, identified based on size and ventral position within clone, which do not express Nmr1. Anterior is up; white bar indicates midline; dashed lines outline clone boundaries. Scale bar – 10um.



**Figure S4**

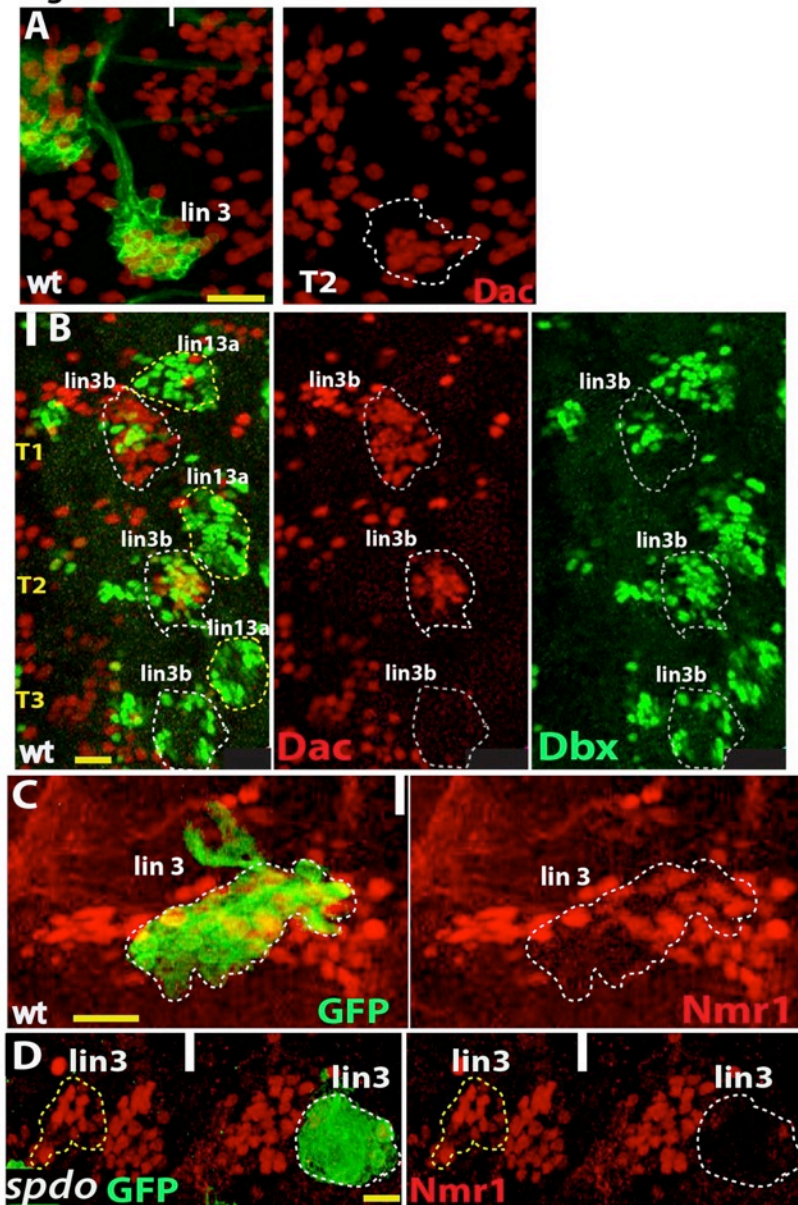

Figure S4) Dachshund, Dbx, Nkx6, and Nmr1 expression in lineage 3 in thoracic segments of late-third instar larvae.

(A) Wild-type lineage 3 MARCM clone labeled for Dachshund (Dac, red). (B) Dac and Dbx expression in lineage 3b neurons. Dashed lines outline lineage 3b and lineage 13a neurons. These neurons were mapped to the indicated lineages based on analysis of MARCM clones generated in other animals (e.g. see panel A). In A and B, T1, T2, and T3 refer to first, second, and third thoracic segments, the borders of which are identified by the  $Dbx^+$  lineage 13a, which only occurs in T1, T2, and T3. (C) Wild-type lineage 3 MARCM clones labeled for Nmr1 (red). (D) *spdo* mutant lineage 3 MARCM clone (green) lacks Nmr1 (red) expression; Nmr1 expression in lineage 3 neurons is shown in contralateral hemisegment. Anterior is up; white bar indicates midline. Scale bar – 10um.

**Figure S5**

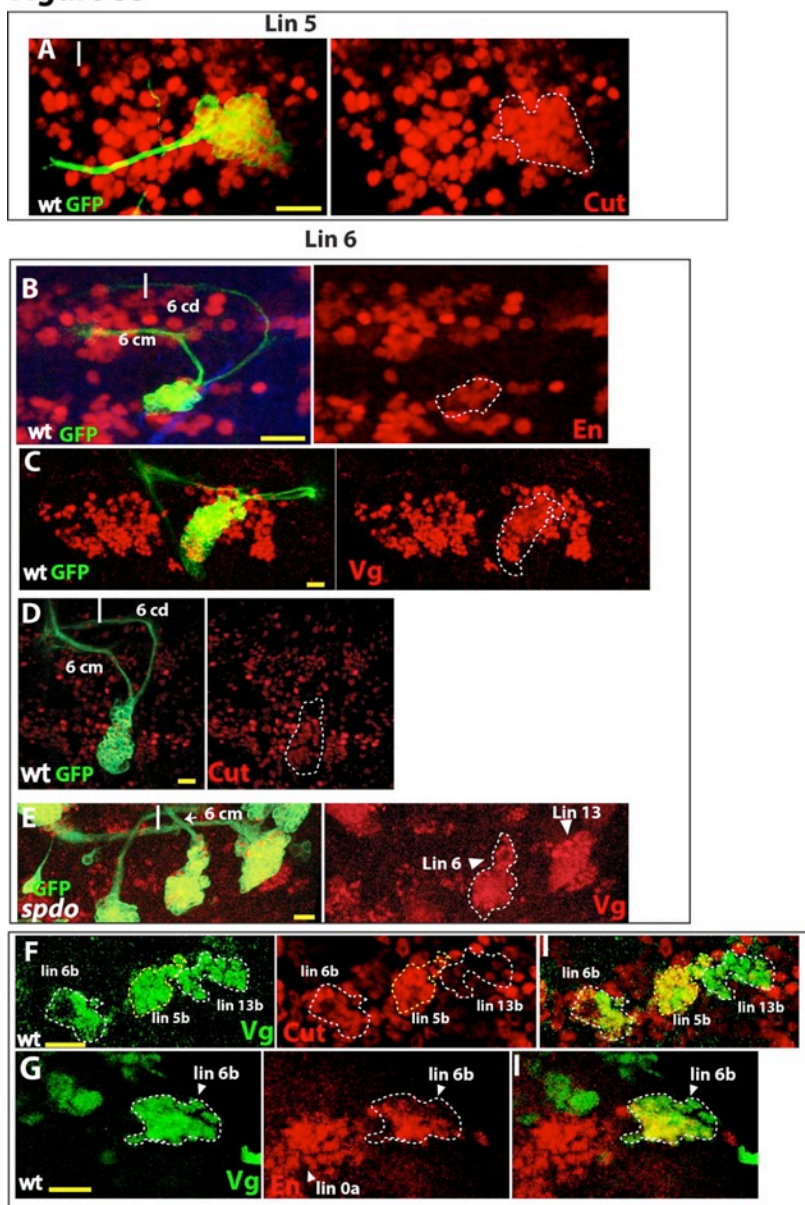

Figure S5) MARCM analysis of lineages 5 and 6 in late-third instar larvae.

(A) Wild-type lineage 5 MARCM clone labeled for Cut. (B-D) Wild-type lineage 6 MARCM clones labeled for Engrailed (En, B), Vestigial (Vg, C), and Cut (D) extend two neurite bundles contralaterally (6cm, 6cd). (E) In *spdo* mutant lineage 6 MARCM clones, most neurons express Vestigial; Vestigial expression in lineage 13 is also indicated. (F) Co-expression of Vg (green) and Cut (red) in lineage 5b and 6b neurons; Vestigial expression in lineage 13b neurons is also shown. (G) Co-expression of Vg (green) and Engrailed (red) in many lineage 6b neurons; Engrailed expression is also shown in lineage 0a neurons. Anterior is up; white bar indicates midline. Scale bar – 10µm.



**Figure S6**

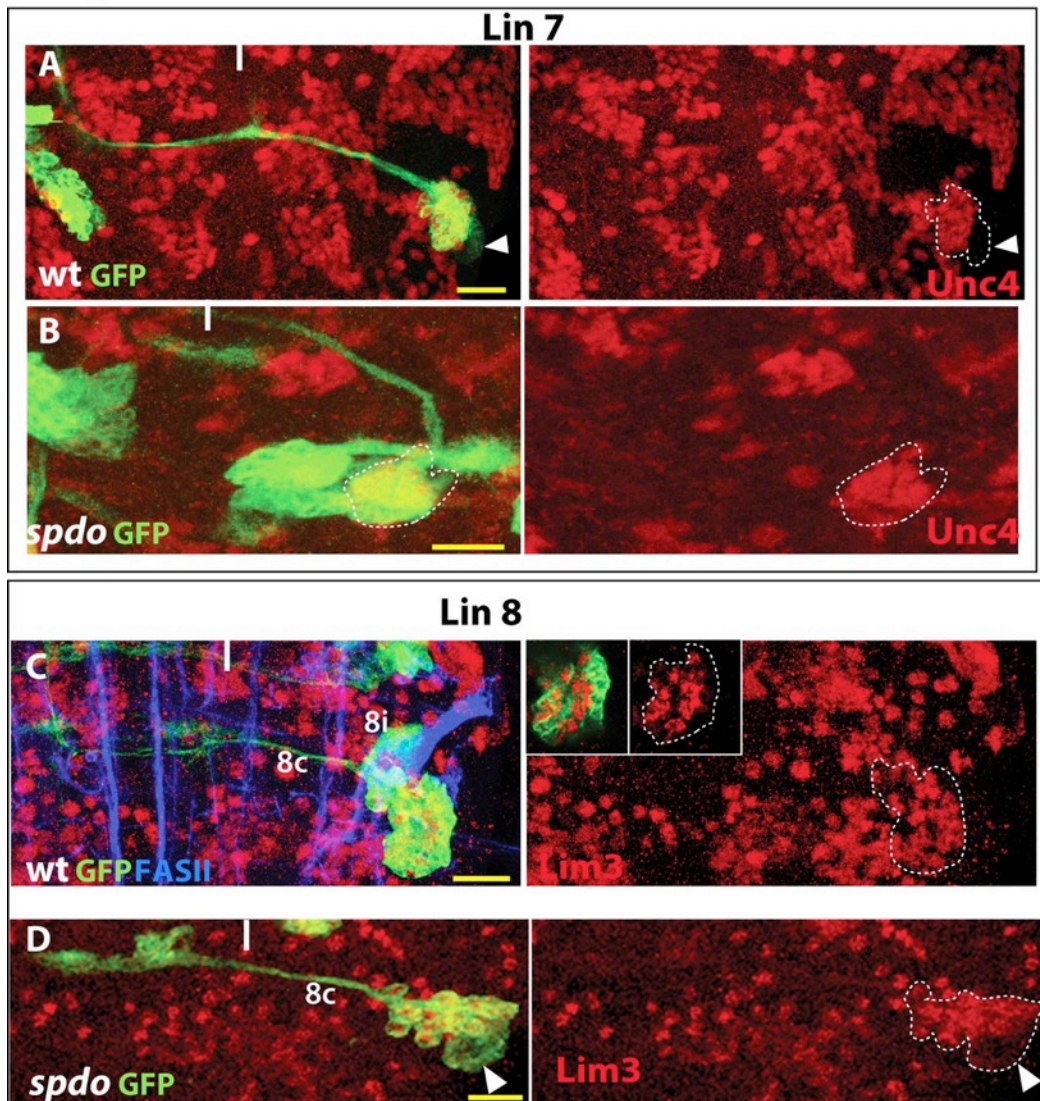

Figure S6) MARCM analysis of lineages 7 and 8 in late-third instar larvae.

(A) Wild-type lineage 7 MARCM clone labeled for Unc4 (red). Arrowhead points to NB, identified based on its large size and ventral position in clone, and adjacent GMCs that do not express Unc4. (B) *spdo* mutant lineage 7 MARCM clone labeled for Unc4 (red): the number of Unc4-expressing neurons increases. Note that two adjacent MARCM clones obscure boundary of lineage 7 clone. (C) Wild-type lineage 8 MARCM clone labeled for Lim3 (red) and Fas II (blue) extend neurite bundles ipsilaterally (8i) and contralaterally (8c). Inset shows a single Z-section of the clone revealing Lim3 expression in a subset of neurons in clone. (D) *spdo* mutant lineage 8 MARCM clone, most neurons express Lim3 and project axons contralaterally (8c). Arrowhead points to NB, identified based on size and ventral position, which lacks Lim3 expression. Anterior is up; white bar indicates midline; dashed lines outline clone boundaries. Scale bar – 10um.

Figure S7

lin 11

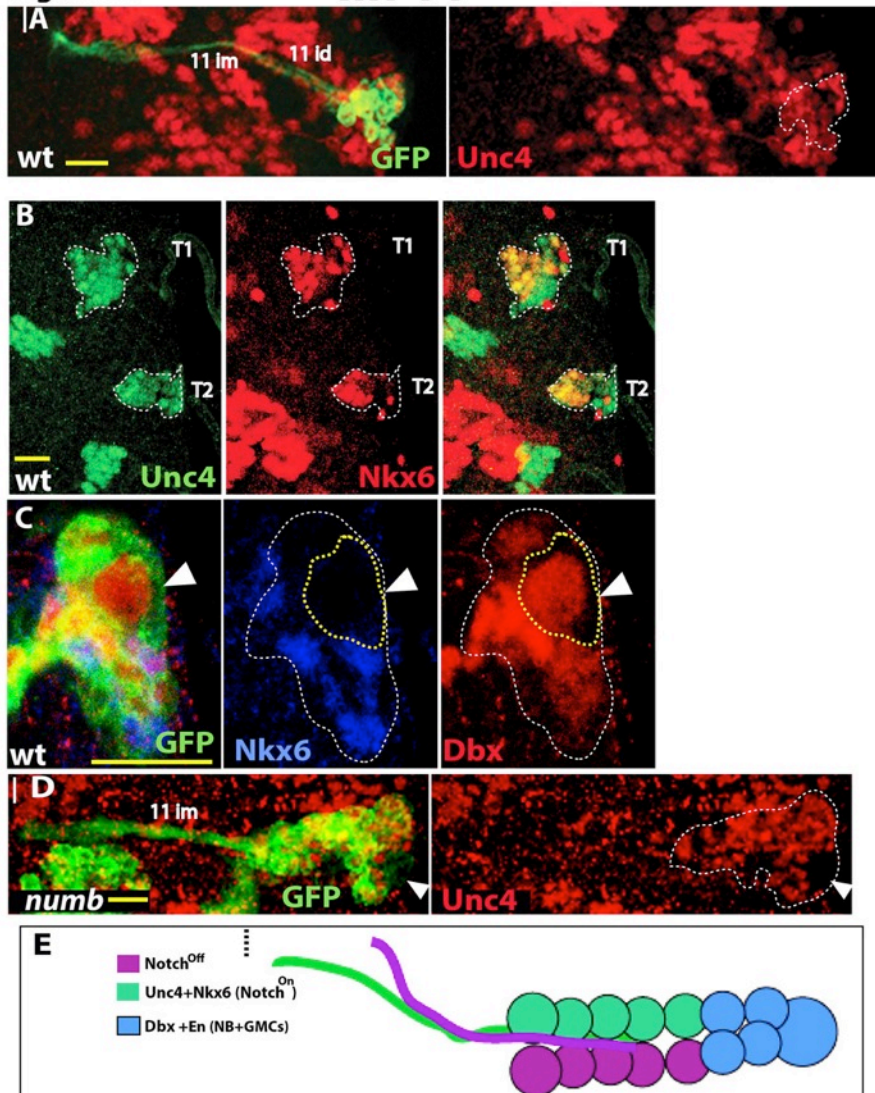

Figure S7) MARCM analysis of lineage 11 in late-third instar larvae.

(A) Wild-type lineage 11 MARCM clone labeled for Unc4 (red) extends a neurite bundle that forks as it approaches the midline (11im, 11id). (B) Unc4 (green) and Nkx6 (red) co-expression in lineage 11 neurons (arrowheads; dashed lines). Predicted boundaries of lineage 11 neurons based on analysis of Unc4 and Nkx6 expression in lineage 11 MARCM clones generated in other animals. T1 and T2 refer to first and second thoracic segments. (C) Dbx (red) and Nkx6 (blue) expression in a wild-type lineage 11 MARCM clone. Dbx expressed in the NB (arrowhead), identified based on its size, and adjacent GMCs. (D) *numb* mutant lineage 11 MARCM clone labeled for Unc4 (red): the clone is larger than in wild-type and contains mostly Unc4<sup>+</sup> neurons. Arrowhead points to NB, identified by its size and ventral position in clone, which does not express Unc4. (E) Schematic of gene expression in lineage 11. Anterior is up; white bar indicates midline; dashed lines outline clone boundaries. Scale bar – 10 μm.



**Figure S8** **lin 13**

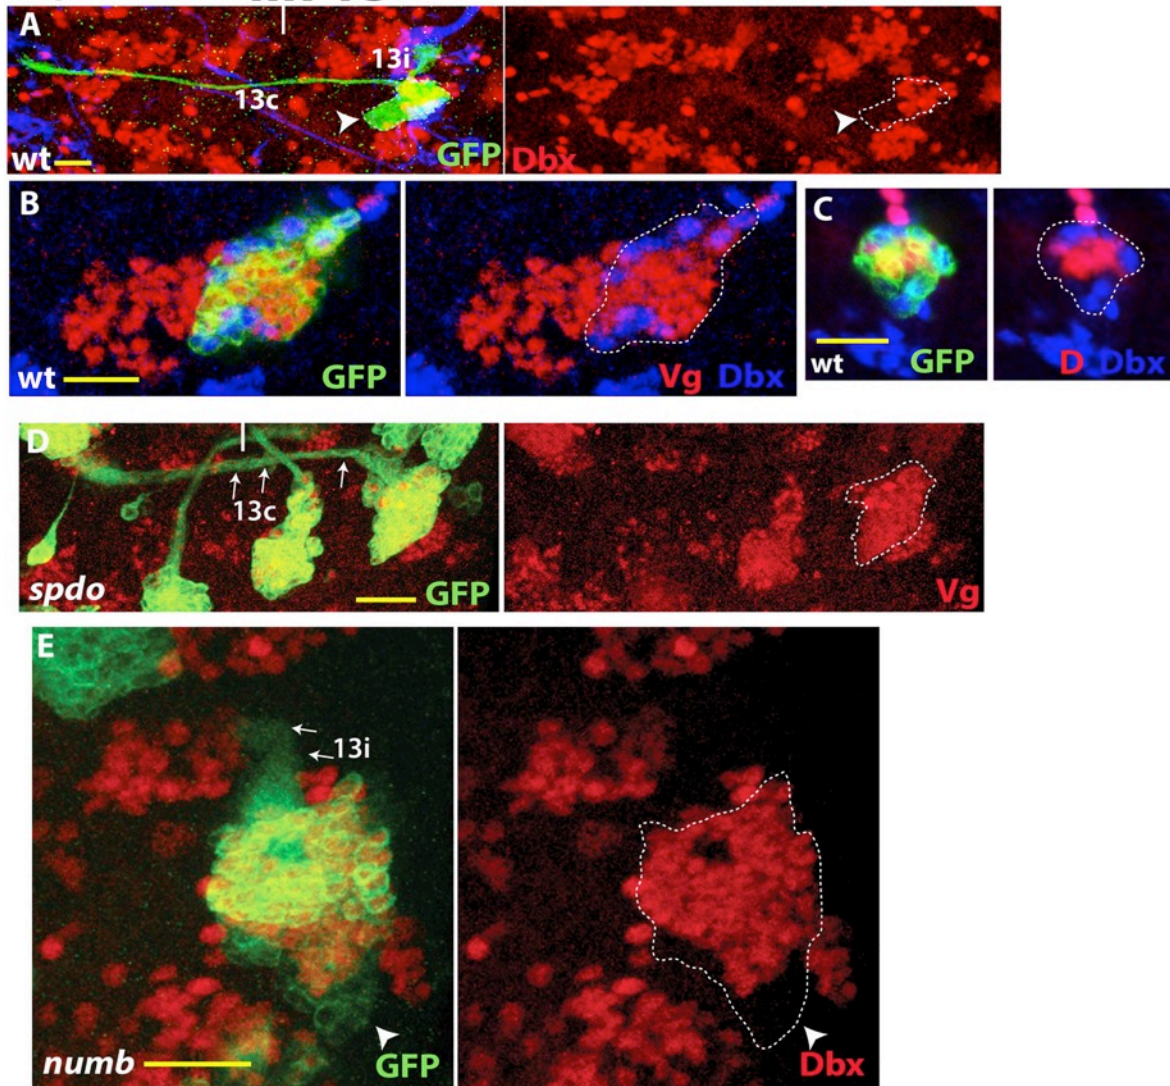

Figure S8) MARCM analysis of lineage 13 in late-third instar larvae.

(A) Wild-type lineage 13 MARCM clone labeled for Dbx (red) extends a short neurite bundle ipsilaterally (13i) and a long neurite bundle contralaterally (13c). Arrowhead points to Dbx<sup>+</sup> NB, identified based on size and position within clone. (B) Wild-type lineage 13 MARCM clone labeled for Vestigial (red) and Dbx (blue): the two proteins are expressed in mutually exclusive sets of neurons. (C) Wild-type lineage 13 MARCM clone labeled for Dichaete (red) and Dbx (blue): the two proteins are expressed in mutually exclusive sets of neurons. (D) *spdo* mutant lineage 13 MARCM clone labeled for Vestigial (red): most neurons in clone express Vg and extend the 13c neurite bundle contralaterally (arrows). (E) *numb* mutant lineage 13 MARCM clone: most neurons express Dbx and extend the short 13i neurite bundle ipsilaterally (arrows). Arrowhead points to the NB and adjacent GMCs identified based on size and ventral location in the clone, which lack Dbx expression. Anterior is up; white bar indicates midline. Scale bar: 10um.

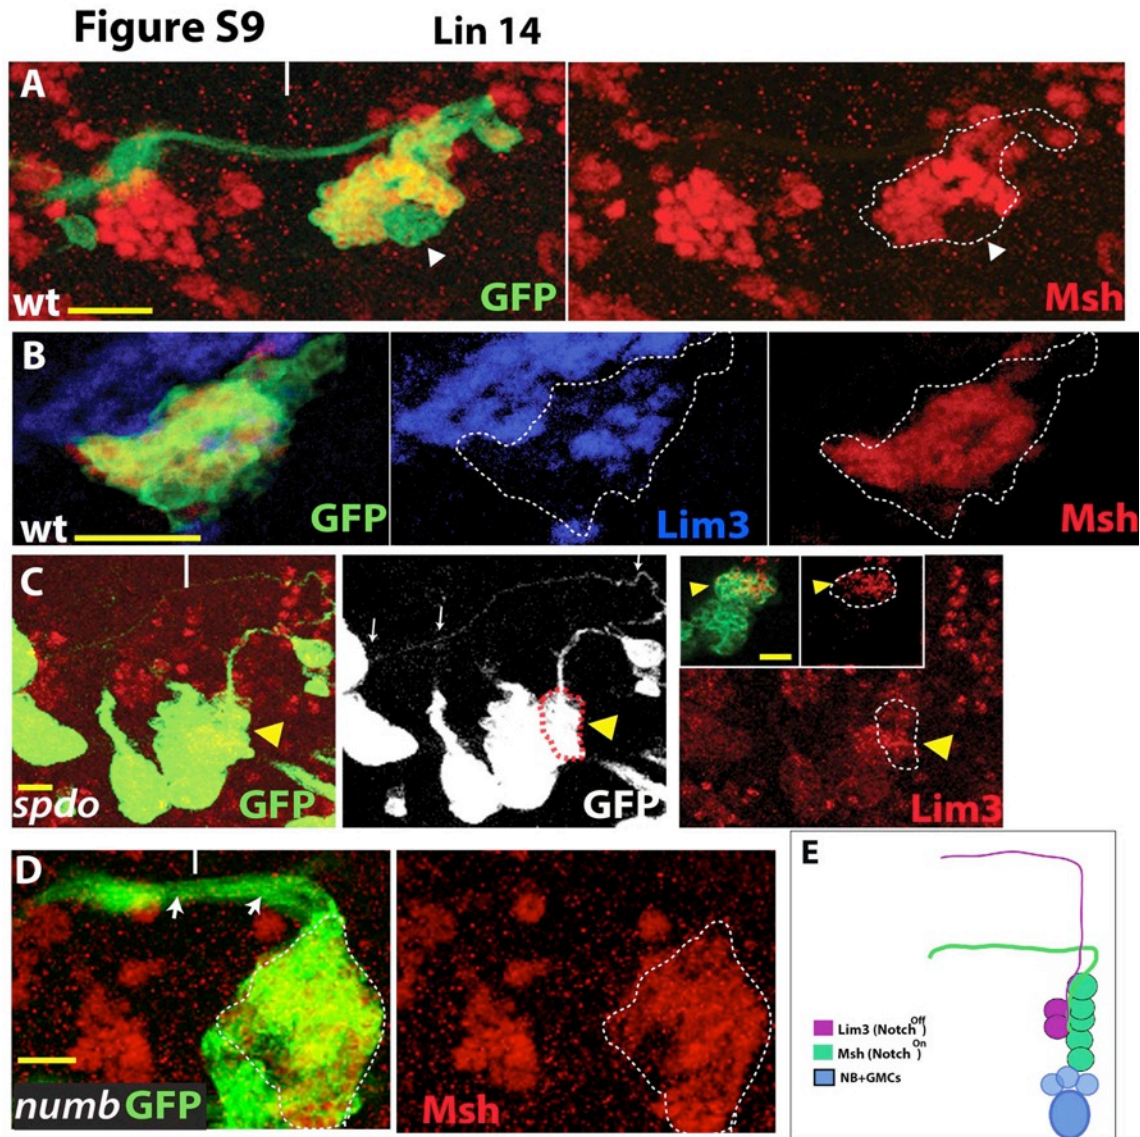

Figure S9) MARCM analysis of lineage 14 in late-third instar larvae

(A) Wild-type lineage 14 MARCM clone labeled for Msh (red) extends a thick ventral neurite bundle contralaterally and a thin dorsal neurite bundle contralaterally, the latter being too faint to be visible in the image. Arrowhead points to the Msh<sup>+</sup> NB, identified by its size and position in clone, and adjacent GMCs. (B) Wild-type lineage 14 MARCM clone labeled for Lim3 (blue) and Msh (red): the two proteins are not co-expressed in neurons of this lineage. (C) *spdo* mutant lineage 14 MARCM clone (dotted lines) labeled for Lim3 expression: most neurons in the clone express Lim3 and extend a thin dorsal neurite bundle (arrows). Boundaries of lineage 14 mutant clone were determined by analysis of individual Z-sections as shown in inset. (D) *numb* mutant lineage 14 MARCM clone labeled for Msh expression: most neurons express Msh and extend a thick ventral neurite bundle (arrows). (E) Schematic of gene expression in lineage 14. Anterior is up; white bar indicates midline; dashed lines outline clone boundaries. Scale bar – 10µm.



**Figure S10**

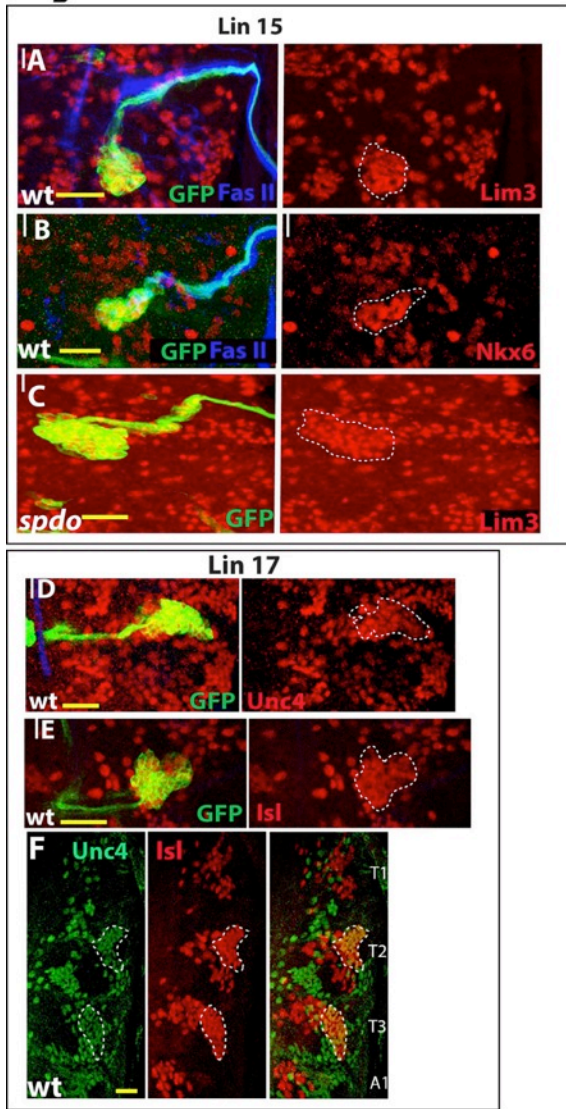

Figure S10) MARCM analysis of lineages 15 and 17 in late-third instar larvae (A, B) Wild-type lineage 15 MARCM clone labeled for Lim3 (red in A), Nkx6 (red in B), and Fas II (blue in A, B). (C) *spdo* mutant lineage 15 MARCM clone labeled for Lim3 (red): the clone is larger and most neurons express Lim3. (D, E) Wild-type lineage 17 MARCM clone labeled for Unc4 (D) and Isl (E) extends an ipsilateral neurite bundle towards the midline. (F) Co-expression of Unc4 (green) and Isl (red) in lineage 17 occurs in the second and third, but not first, thoracic segments. Anterior is up; white bar indicates midline. Scale bar: 10um.

**Figure S11**

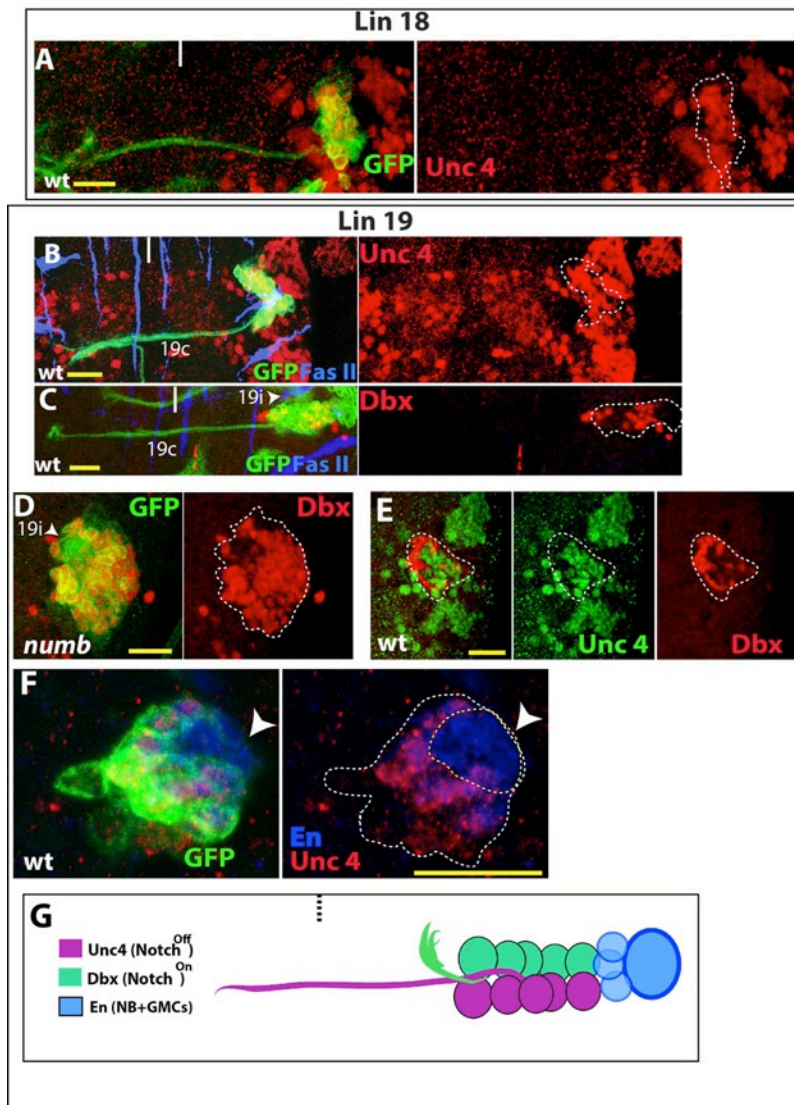

Figure S11) MARCM analysis of lineages 18 and 19 in late-third instar larvae  
 (A) Wild-type lineage 18 MARCM clone labeled for Unc4 (red) extends a contralateral axon projection. (B, C) Wild-type lineage 19 MARCM clone labeled for Unc4 (red, B) and Dbx (red, C) extends a short ipsilateral neurite bundle (19i, C) and a long contralateral neurite bundle (19c). (D) *numb* mutant lineage 19 MARCM clone labeled for Dbx: most neurons express Dbx. (E) Dbx (red) and Unc4 (green) expression in lineage 19: the two proteins are not co-expressed in neurons. (F) Wild-type lineage 19 MARCM clone labeled for Engrailed (blue) and Unc4 (red): arrowhead points to Engrailed<sup>+</sup> NB, identified based on its size and location, and adjacent GMCs. (G) Schematic of gene expression in lineage 19. Anterior is up; white bar indicates midline; dashed lines outline clone boundaries. Scale bar: 10μm.

## Figure S12

### Lin 20-22

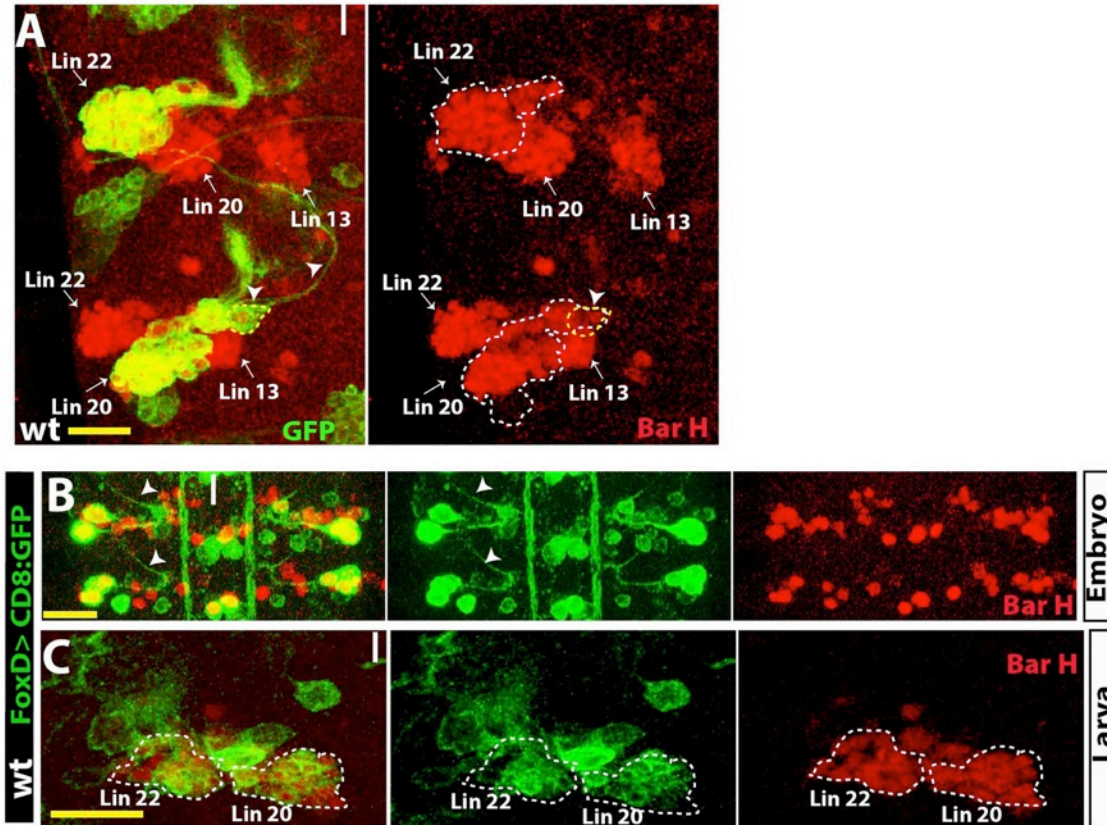

Figure S12) MARCM analysis of lineages 20 and 22

(A) Wild-type MARCM clones of lineages 20 and 22 in a late-third instar larva labeled for BarH1/2 (red). These lineages are identical in morphology; thus, the labeling is arbitrary. BarH1/2 is expressed in all neurons of lineage 20 and 22, including motor neurons. Arrowheads point to motor neuron and motor axon. (B, C) BarH1/2 (red) and GFP reporter gene expression driven by a FoxD enhancer (green) shown in the CNS of a late stage embryo (B) and late-third instar larva (C). (B) BarH1/2 is expressed in motor neurons that derive from NB 5-4 in embryo (arrowheads indicate motor neuron axons). (C) The FoxD enhancer drives reporter expression in BarH1/2-expressing neurons of post-embryonic lineages 20 and 22. Anterior is up; white bar indicates midline. Scale bar: 10um.



**Figure S13**

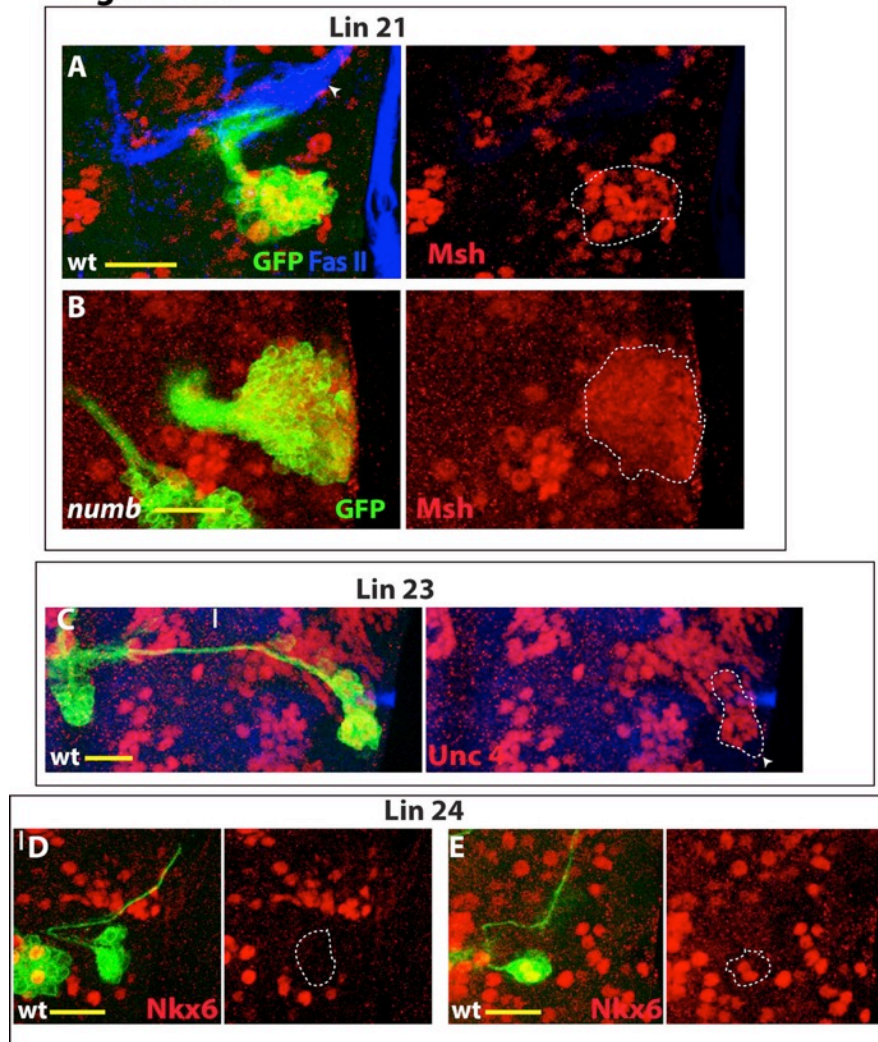

Figure S13) MARCM Analysis of lineages 21, 23 and 24 in late-third instar larvae  
 (A) Wild-type MARCM clone of lineage 21 labeled for Msh (red) and FasII (blue) extends an ipsilateral neurite, which terminates posterior to the lateral cylinder (arrowhead). (B) *numb* mutant lineage 21 MARCM clones labeled for Msh expression: the clones are bigger than wild-type; most neurons in them express Msh. (C) Wild-type MARCM clone of lineage 23 labeled for Unc4 (red) extends a contralateral neurite bundle. (D, E) Wild-type MARCM clones of lineage 24 labeled for Nkx6 (red): some clones lack Nkx6<sup>+</sup> neurons (D), and other clones contain Nkx6<sup>+</sup> neurons (E).

Anterior is up; white bar indicates midline; dashed lines outline clone boundaries. Scale bar: 10µm.



### **Supplementary References:**

- Blochlinger, K., L. Y. Jan, et al. (1993). "Postembryonic patterns of expression of cut, a locus regulating sensory organ identity in *Drosophila*." Development **117**(2): 441-450.
- Broihier, H. T., A. Kuzin, et al. (2004). "*Drosophila* homeodomain protein Nkx6 coordinates motoneuron subtype identity and axonogenesis." Development **131**(21): 5233-5242.
- Broihier, H. T. and J. B. Skeath (2002). "*Drosophila* homeodomain protein dHb9 directs neuronal fate via crossrepressive and cell-nonautonomous mechanisms." Neuron **35**(1): 39-50.
- Emery, I. F., V. Bedian, et al. (1994). "Differential expression of Broad-Complex transcription factors may forecast tissue-specific developmental fates during *Drosophila* metamorphosis." Development **120**(11): 3275-3287.
- Guss, K. A., H. Mistry, et al. (2008). "Vestigial expression in the *Drosophila* embryonic central nervous system." Dev Dyn **237**(9): 2483-2489.
- Lacin, H., Y. Zhu, et al. (2009). "dbx mediates neuronal specification and differentiation through cross-repressive, lineage-specific interactions with eve and hb9." Development **136**(19): 3257-3266.
- Leal, S. M., L. Qian, et al. (2009). "Neuromancer1 and Neuromancer2 regulate cell fate specification in the developing embryonic CNS of *Drosophila melanogaster*." Dev Biol **325**(1): 138-150.
- McDonald, J. A., S. Holbrook, et al. (1998). "Dorsoventral patterning in the *Drosophila* central nervous system: the vnd homeobox gene specifies ventral column identity." Genes Dev **12**(22): 3603-3612.
- Higashijima, S., T. Michiue, et al. (1992). "Subtype determination of *Drosophila* embryonic external sensory organs by redundant homeo box genes BarH1 and BarH2." Genes Dev **6**(6): 1005-1018.
- Nambu, P. A. and J. R. Nambu (1996). "The *Drosophila* fish-hook gene encodes a HMG domain protein essential for segmentation and CNS development." Development **122**(11): 3467-3475.
- Osterwalder, T., K. S. Yoon, et al. (2001). "A conditional tissue-specific transgene expression system using inducible GAL4." Proc Natl Acad Sci U S A **98**(22): 12596-12601.
- Patel, N. H., B. Schafer, et al. (1989). "The role of segment polarity genes during *Drosophila* neurogenesis." Genes Dev **3**(6): 890-904.
- Vactor, D. V., H. Sink, et al. (1993). "Genes that control neuromuscular specificity in *Drosophila*." Cell **73**(6): 1137-1153.
- Zhu, S., S. Lin, et al. (2006). "Gradients of the *Drosophila* Chinmo BTB-zinc finger protein govern neuronal temporal identity." Cell **127**(2): 409-422.
